# Supplementary material
Source: PubMed Central journal article supplement (PMC3592331)
Supplement: jf3046076_si_001.pdf [file jf3046076_si_001.pdf]

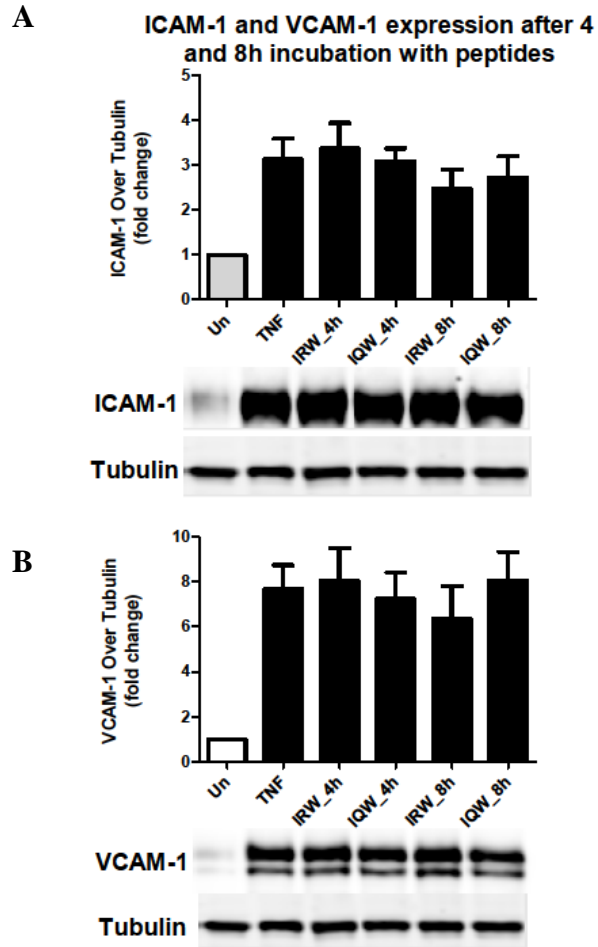

**Supplementary Figure 1:**

Confluent HUVEC monolayers were pre-treated with 50 $\mu$ M of IRW or IQW for 4h or 8h prior to 4h stimulation with 5ng/mL TNF. ICAM-1 (A) and VCAM-1 (B) were quantified by densitometry and normalized to tubulin bands on western blotting of the cell lysates. Representative images from 4 independent experiments are shown. Data presented as mean $\pm$ SEM.
